# Supplementary material
Source: PubMed Central journal article supplement (PMC3511702)
Supplement: 1212597109_pnas.201212597SI.pdf [file 1212597109_pnas.201212597SI.pdf]

# Supporting Information

Gianni et al. 10.1073/pnas.1212597109

## SI Materials and Methods

**$\beta$ 3-Integrin Silencing, Western Blot (IB), and Cell-ELISA of Silencing.** Lentiviruses expressing two different sh-RNAs to  $\beta$ 3-integrin (ITGB3), pseudotyped with vesicular stomatitis virus G glycoprotein, were produced by transfection of pFuGW-ITGB3-1 or pFuGW-ITGB3-2 and additional appropriate plasmids into 293T cells (all kindly provided by the authors of ref. 1), harvested 48 h later, and immediately used to transduce 293T cells. The transduced (sh- $\beta$ 3) cells were monitored for effective silencing 7–10 d later. Two to three independently generated cell pools were obtained for each cell line. They were assayed for extent of silencing, and one for each cell line was then used for following assays. The sh- $\beta$ 3 cells remained stably silenced for several months. The control mock-silenced cells were generated similarly by means of plasmid pFuGW-control. Cell surface expression of  $\alpha$  $\beta$ 3-integrin was measured by cell-ELISA, as described (2). Briefly, wt-293T or sh- $\beta$ 3 cells were grown in 96 well plates, reacted with MAb L609 to the  $\alpha$  $\beta$ 3-heterodimer or with MAb AP3 to  $\beta$ 3-integrin subunit for 2 h at 4 °C, paraformaldehyde-fixed, and then reacted with anti-mouse peroxidase, followed by *o*-phenylenediamine (Sigma-Aldrich) at 0.5 mg/mL and reading the optical density at 490 nm. IB analysis was carried out by means of PAb AB1932 (Chemicon).

**Transgene Expression and NF- $\kappa$ B Activity.** Control or sh- $\beta$ 3 cells, or K562 cells negative or positive for  $\alpha$  $\beta$ 3-integrin, were transfected by means of Arrest-in (Thermo Scientific) or Lipofectamine2000 Plus reagent (Invitrogen) with plasmids encoding firefly luciferase under a NF- $\kappa$ B regulated promoter (NF- $\kappa$ B-luc) (800 ng/2  $\times$  10<sup>5</sup> cells) and Renilla luciferase (luciferase:renilla ratio 130:1), plus TLR2-FLAG or pcDNA 3.1 empty vector (50 ng/2  $\times$  10<sup>5</sup> cells), as indicated. Alternatively, 293T cells were transfected with wt-Dyn or Dyn-K44A plasmids (3). After transfection with NF- $\kappa$ B-luc plasmid, cells were incubated with pre-exhausted medium for 2–3 d before use. To prepare the pre-exhausted medium, the respective (293T or K562) cells were grown, and the medium was replaced with fresh medium containing 1% or 5% (vol/vol) FCS, incubated with the cells for 2–3 d, and thereafter filtered twice through 0.22  $\mu$ m filters. The transfected cells were then exposed to the indicated viruses (UV-irradiated or not) for indicated times or stimulated with LPS (Sigma-Aldrich, # L2630) (100 ng/mL), which induced a strong TLR2 response. Luciferase activity was quantified by means of Dual-Glo luciferase reporter assay system (Promega) and expressed as luciferase/renilla ratio (4). For detection and quantification of endogenous I $\kappa$ -B $\alpha$ , wt- or sh- $\beta$ 3 293T cells, transfected or not with TLR2, were infected with UV-inactivated wt-HSV (wt-HSV-UV) or R9710 (20 PFU/cell). Lysates were harvested at 2, 4, and 6 h after infection in buffer containing 20 mM Hepes, 250 mM NaCl, 1 mM EDTA, 1 mM DTT, 0.5% Nonidet P-40, plus protease and phosphatase inhibitors (Sigma-Aldrich), and separated by SDS PAGE. I $\kappa$ -B $\alpha$  was detected by IB with anti-I $\kappa$ -B $\alpha$  Ab (Cell Signaling). NF- $\kappa$ B activation leads to degradation of I $\kappa$ -B $\alpha$ , visible as a decreased band. The blots were also reacted with anti-tubulin Ab (Sigma-Aldrich). Quantification of the bands, expressed as DUs, was performed by Image-J software, and expressed as ratio of the DU of band of interest relative to that of tubulin, in the same sample. Data were expressed as percentage of the I $\kappa$ -B $\alpha$ /tubulin value in uninfected cells.

**Infection.** The  $\beta$ -gal-expressing R8102 is an otherwise wt-HSV-1 (F) carrying the reporter Lac-Z under the  $\alpha$ 27 immediate-early promoter (5). R7910 carries the deletion of  $\alpha$ 0 gene ( $\Delta$ ICP0) (6). Cells were infected at the indicated multiplicities with extracel-

lular virions, previously pelleted by ultracentrifugation. Following virus absorption to cells for 90 min at 37 °C, virus inoculum was removed, and monolayers were rinsed twice with medium. Infection with  $\beta$ -gal-expressing R8102 was stopped at 6 h after infection and revealed by X-gal staining (5). For virus yield determinations, cells were frozen at 4 h (0 time) or 24 h after virus absorption. The virus was titrated by plaque assay in Vero [HSV-1(F)] or U2OS (R7910) cells.

**Reverse Transcription and q-RT-PCR.** Total RNA was purified with Total RNA Isolation kit (Macherey-Nagel) according to the manufacturer's instructions; the procedure included digestion with DNase. Total RNA (1  $\mu$ g/20  $\mu$ L reaction mix) from mock- or HSV-infected cells, positive or negative for TLR2, wt, or sh- $\beta$ 3, was reverse transcribed with a high-capacity cDNA reverse transcription kit (Applied Biosystems). Real-time PCR primers were the inventoried TaqMan gene expression assays (Applied Biosystems) (see list in Table S1). Reactions were performed in triplicates in a 20  $\mu$ L volume that included cDNA (150 ng), gene expression assay (1  $\mu$ L), and TaqMan gene expression master mix (10  $\mu$ L) (Applied Biosystems). Real-time PCR reactions were performed on an Applied Biosystems Prism 7300 sequence detection system. Samples were normalized relative to GAPDH Ct. To compare mock and infected cell samples, relative changes in gene expression were determined using the 2<sup>- $\Delta\Delta$ Ct</sup> method. Data represent average of triplicates and were expressed as fold-variations relative to the uninfected cell value. Variations  $\geq$  twofold relative to the corresponding value of mock-infected cells were considered significant.

**Cytokine Quantification.** To determine the amount of IFN- $\beta$  and IL10 produced by wt- or sh- $\beta$ 3 cells, negative or positive for TLR2 as indicated, the cell culture media were harvested 24 or 48 h after infection with R7910. IFN- $\beta$  was detected by means of VeriKine kit (Pestka Biomedical Laboratories, PBL IFN Source) and human IL10 by Elisa kit (Thermo Scientific, Pierce). Media were added to the precoated wells in a 1:1 ratio with the kit dilution buffer for 1–2 h, according to the manufacturer's instructions. The bound cytokines were revealed with appropriate antibodies conjugated to peroxidase plus substrate and reading the optical density at 450 nm. Standard quantities of the purified cytokines were run in parallel for relative quantification.

**BIACore.** Kinetic measurements of the interaction between soluble gH/gL and soluble  $\alpha$  $\beta$ 3-integrin purified from 293-B3 AVAP cells (a gift of Stephen Nishimura, University of California, San Francisco, CA) were made with a Biacore 2000 instrument (Biacore AB) as described (7). MAb LS-C44264 to AP (LifeSpan BioScience) was used to capture the integrins on the surface of the sensor chip. Measurements were made at 25 °C, and soluble gH/gL was injected immediately after integrin capturing at a flow rate of 50  $\mu$ L/min.

**Coimmunoprecipitation of  $\beta$ 3-Integrin by TLR2-Flag.** Cells were transfected with plasmids encoding  $\alpha$  $\beta$ 3-integrin, TLR2-flag, or both. TLR2 was immunoprecipitated 24 h later by means of anti-flag MAb (Sigma-Aldrich). The proteins retained by protein A/G Sepharose were separated by SDS/PAGE and reacted with anti- $\beta$ 3-integrin Ab (4).

**gH/gL.** The purification and properties of the soluble gH<sub>i</sub>/gL were described (2).
